# Supplementary material for: Recovery of phosphorus and nitrogen from domestic wastewater by using dolomite rock through struvite precipitation
Source: Research Square preprint supplement (doi:10.21203/rs.3.rs-7322931/v1), 2025-09-03
Supplement: Supplementary file 1 [file 676f8b1b0349ba3310b60f3b.docx]

**Highlights**

- The maximum amount of phosphorus and nitrogen recovery was found at a wastewater to dolomite ratio of 50:70ml.
- The percentage of phosphorus recovery was 100%.
- The percentage of nitrogen recovery was 88.75%.
- The quantity of struvite produced from 50ml wastewater and 70ml dolomite solution was 0.123g
